# Supplementary material
Source: publisher figshare collection journal article supplement (https://frontiersin.figshare.com/ndownloader/files/26140406)
Supplement: Supplementary file 1 [file 26140406]

## Sheet: Sheet1
Compound Name	Hallmark(s)	Mechanism	Structural Class	Structure	Structure Reference	FDA Approval / Clinical Trials	Source Species	Species location - geographic	Location Reference	species location - depth	Depth Reference	Compound use in organism	Reference for use
Aeroplysinin-1	Sustaining Proliferative Signaling, Resisting Cell Death, Inducing Angiogenesis, Activating Invasion and Metastasis, Tumor-promoting Inflammation	inhibits the signal transduction of EGFR,inhibits blood vessel growth	brominated tyrosine metabolite		Lipowicz et al. 2013	preclinical	Verongia aerophoba (sponge)	Capo Caccia	Ciminiello et al., 1997	10 m	Ciminiello et al., 1997	chemical defense	García-Vilas et al., 2015
Aplidin	Resisting Cell Death, Inducing Angiogenesis	activated the Fas/CD95 pathway; caused cell cycle arrest at the G1 and G2 phases; blocks VEGF secretion	cyclic depsipeptide		Simmons et al. 2005	FDA-approved to treat multiple myeloma	Aplidium albicans (tunicate)	Mediterranean waters	Erba et al., 2002	50-60* m	https://obis.org/taxon/103634	-	-
Apratoxin A	Resisting Cell Death	induces apoptosis with G1 cell cycle arrest	cyclodepsipeptide		Luesch et al. 2006	preclinical	Lyngbya majuscula Harvey ex Gomont (cyanobacteria)	Finger's Reef, Apra Harbor, GU, USA.	Luesch et al., 2001	0-10* m	https://obis.org/taxon/660754	secondary metabolite formed during photosynthesis	Paerl et al., 2016
Asterosaponin 1	Resisting Cell Death	inhibited the polymerization of tubulin	sulfated steroidal glycoside		Cheng et al. 2006	preclinical	Culcita novaeguineae (starfish)	Sanya Bay in the South China Sea	Tang et al., 2006	2–15 m	Tang et al., 2006	chemical defense	Tang et al., 2006
Axinelloside A	Enabling Replicative Immortality	inhibits telomerase	Sulfated Lipopolysaccharide		Warabi et al. 2005	preclinical	Axinella infundibula (sponge)	Shikine-jima Island	Warabi et al., 2005	15-20 m	Warabi et al., 2005	-	-
Brentuximab vedotin	Resisting Cell Death	deliver MMAE drug to cell targeted by antibody	vedotin		Zhao et al. 2019	FDA-approved for the treatment of Hodgkin’s lymphoma	N/A (synthetic)	N/A (synthetic)	N/A (synthetic)	N/A (synthetic)	N/A (synthetic)	N/A (synthetic)	N/A (synthetic)
Bryostatin-1	Evading Growth Suppressors	activate GSK3-beta, which induces degradation of cyclinD1	macrocyclic lactone		Haefner 2003	Phase II, discontinued	Bugula neritina	Gulf of Mexico	Pettit et al., 1982	0-10* m	https://obis.org/taxon/111158	similar to metabolites produced by bacterial symbiont Candidatus Endobugula sertula	Davidson et al., 2001
Cryptophycin 1	Resisting Cell Death	prevents microtubule polymerization	cyclic depsipeptide		Mooberry, Busquets, and Tien 1997	preclinical	Nostoc sp. GSV 224 (cyanobacteria)	N/A (cultivated in laboratory)	Golakoti et al., 1995	N/A (cultivated in laboratory)	N/A (cultivated in laboratory)	-	-
Cryptophycin 52	Resisting Cell Death	phosphorylated BCL-2	depsipeptide		Sammet et al. 2010	Phase II	Nostoc sp. GSV 224 (cyanobacteria)	N/A (cultivated in laboratory)	Golakoti et al., 1995	N/A (cultivated in laboratory)	N/A (cultivated in laboratory)	-	-
Curacin-A	Resisting Cell Death	inhibited the polymerization of tubulin	Thiazole lipid		Fiers et al. 2016	preclinical	Lyngbya majuscula (cyanobacteria)	Curacao, Netherland Antilles	Gerwick et al., 1994	0.3 m	Gerwick et al., 1994	-	-
Cytarabine	Resisting Cell Death	inserted in newly replicating DNA in place of nucleotides	pyrimidine nucleoside		Jiminez, Wilke, and Costa-Lotufo 2018	FDA-approved for the treatment of leukemia and lymphoma	Synthetically derived from Spongotheymadine Cryptotethya crypta (sponge)	N/A (synthetic)	N/A (synthetic)	N/A (synthetic)	N/A (synthetic)	N/A (synthetic)	N/A (synthetic)
Didemnin B	Resisting Cell Death	activates the FK-506 apoptotic pathway	depsipeptide		Simmons et al. 2005	Phase II, discontinued	Trididemnum solidum (tunicate)	Columbia, Honduras, Mexico, Belize, Panama (carribean waters)	Rinehart et al., 1981	0-10* m	https://obis.org/taxon/251537	-	-
Discodermolide	Sustaining Proliferative Signaling, Resisting Cell Death	blocks dynamic instability of microtubules and induces senescence	polyhydroxylated lactone		Balachandran et al. 1998	Phase I	Discodermia dissoluta (sponge)	Lucaya, Grand Bahama Island	Gunasekera et al., 1990	33 m	Gunasekera et al., 1990	-	-
Dolastatin 10	Resisting Cell Death	inhibited the polymerization of tubulin	pentapeptide		Haefner 2003	Phase II, discontinued	Dolabella auricularia (sea hare /shell-less mollusk)	Eastern coast of Mauritius	Pettit et al., 1993	1 - 2 m	Pettit et al., 1993	also found in Paulauan Cyanobacteria	Luesch et al., 2001
Dolastatin 15	Resisting Cell Death	inhibited the polymerization of tubulin	depsipeptide		Simmons et al. 2005	preclinical	Dolabella auricularia (sea hare / shell-less mollusk)	Eastern coast of Mauritius	Pettit et al., 1993	1 - 2 m	Pettit et al., 1993	Found in Lyngbya majuscula/Schizothrix calcicola (cyanobacteria)	Harrigan et al., 1998
E7974	Resisting Cell Death	inhibited the polymerization of tubulin	tripeptide		Kuznetsov et al. 2009	Phase I	synthetic analogue of Hemiasterlin	N/A (synthetic)	N/A (synthetic)	N/A (synthetic)	N/A (synthetic)	N/A (synthetic)	N/A (synthetic)
Eribulin	Resisting Cell Death	inhibits the growth of microtubulins	macrocyclic ketone		Kuznetsov et al. 2004	FDA-approved for the treatment of metastatic breast cancer and liposarcoma	synthetic analogue of Halichondrin B	N/A (synthetic)	N/A (synthetic)	N/A (synthetic)	N/A (synthetic)	N/A (synthetic)	N/A (synthetic)
Fascaplysin	Evading Growth Suppressors	inhibits CDK-4	bis-indole alkaloid		Soni et al. 2000	preclinical	Fascaplysinopsis Bergquist sp. (sponge)	Ndravuni, Fiji	Roll and Ireland 1988	60-70* m	https://obis.org/taxon/165314	-	-
Fucoidan	Evading Growth Suppressors, Resisting Cell Death, Enabling Replicative Immortality, Inducing Angiogenesis, Activating Invasion and Metastasis, Avoiding Immune Destruction	arrests cancer cells at the G1 stage of the cell cycle by down regulating CDK2 and CDK4; inhibit telomerase activity while inducing apoptosis; inhibits VEGF; preventing the attachment of tumor cells by binding to fibronectin, interfering with tumor cell-platelet interactions, and inhibiting MMP-2; decreases the expression of EMT markers; enhance the activity of Natural Killer cells	sulfated polysaccharide		Cumashi et al. 2007	Phase II	Laminaria spp. (seaweed)	California, USA	Bird and Haas 1931	0-10* m	https://obis.org/taxon/143755	-	-
Halenaquinone	Resisting Cell Death	induces ROS and downregulates anti-apoptotic proteins found in mitochondria, including BCL-2	pentacyclic polyketide		Shih et al. 2015	preclinical	Xestospongia exigua (sponge) (acceptable names changed to Neopetrosia exigua or Neopetrosia chaliniformis according to WoRMS)	Palau, Western Caroline Islands	Roll et al., 1983	0-10* m	https://obis.org/taxon/292996	-	-
Halichondrin B	Resisting Cell Death	binds to vinca domain and inhibits tubular polymerization	polyether macrolides		Haefner 2003	preclinical	Halichondria okadai Kadota (sponge)	on the coast of Aburatsubo in the Miura Peninsula (pacific coast of Japan)	Hirata Y and Uemura D, 1986	mediolittoral zone.	Hirata Y and Uemura D, 1986	produced by symbiont	Lichota and Gwozdzinski, 2018
Hemiasterlin	Resisting Cell Death	inhibited the polymerization of tubulin	peptide		Bai et al. 1999	preclinical	Hemiasterella minor (sponge)	Sodwana Bay, North to Durban, South Africa	Talpir et al., 1994	60-70* m	https://obis.org/taxon/170601	-	-
HTI-286	Resisting Cell Death	inhibited the polymerization of tubulin	linear peptide		Ravi, Zask, and Rush III 2005	preclinical	Synthetic Analogue of Hemiasterlin	N/A (synthetic)	N/A (synthetic)	N/A (synthetic)	N/A (synthetic)	N/A (synthetic)	N/A (synthetic)
Kahalalide F	Resisting Cell Death	targets lysosomes	peptide		Hamann, Otto, and Scheuer 1996	Phase II, discontinued	Elysia rufescens (sea slug)	Black Point, O’ahu, Hawaii	Hamann, Otto, and Scheuer, 1996	-	-	chemical defense of possible bacterial origin	Davis et al., 2013
KRN7000	Avoiding Immune Destruction	enhances the cell function of presenting antigens	glycosphingolipid		Martins et al. 2020	Phase I-II	synthetic analog of agelasphin-9b	N/A (synthetic)	N/A (synthetic)	N/A (synthetic)	N/A (synthetic)	N/A (synthetic)	N/A (synthetic)
Lamellarin D	Sustaining Proliferative Signaling, Resisting Cell Death	senescence at G2 checkpoint when DNA topoisomerase I is inhibited	alkaloid		Bailly 2015	preclinical	Lamellaria sp. (prosobranch mollusc)	Koror, Palau	Andersen et al., 1985	5 m	Andersen et al., 1985	used by host mollusc as a predatory mechanism	Bailly, 2015
Largazole	Inducing Angiogenesis	inhibits histone deacetylases; inhibits VEGF and its receptor	cyclodepsipeptide		Liu et al. 2012	preclinical	Symploca sp. (cyanobacterium)	Key Largo, Florida Keys	Taori et al., 2008	10-20* m	https://obis.org/taxon/178512	-	-
Motuporamine C	Inducing Angiogenesis, Activating invasion and metastasis	inhibits the migratory ability of cancer cells; inhibits VEGF	alkaloid		Roskelley et al. 2001	preclinical	Xestospongia exigua (Kirkpatrick) (sponge)	Motupore Island, Papua New Guinea	Williams et al., 1998	15 m	Williams et al., 1998	-	-
NVP-LAQ824	Resisting Cell Death, Inducing Angiogenesis	cause cell cycle arrest at the G2/M phase; downregulates the expression of VEGF	cinnamic hydroxamic acid		Simmons et al. 2005	Phase I	synthetic derivative of Psammaplin A	N/A (synthetic)	N/A (synthetic)	N/A (synthetic)	N/A (synthetic)	N/A (synthetic)	N/A (synthetic)
P11A	Reprogramming of Energy Metabolism	downregulates genes that regulate glycolysis and glutaminolysis	streptodepsipeptide		Ye et al. 2017	preclinical	Streptomyces S11-23B (Actinobacteria)	East China Sea, close to Zhoushan City, China	Ye et al., 2017	marine tidal flat (0 m)	Ye et al., 2017	-	-
Peloruside A	Resisting Cell Death	inhibited the polymerization of tubulin	polyketide		West and Northcote 2000	preclinical	Mycale (Carmia) (sponge)	Pelorus Sound, South Island, New Zealand	West et al., 2000	7−15 m	West et al., 2000	seasonal and spatial variation in metabolite production	Page et al., 2005
Philinopside A	Inducing Angiogenesis	inhibits tube and microvessel formation; inhibits VEGF receptor	sulfated triterpene glycoside		Aminin et al. 2015	preclinical	Pentacta quadrangularis (sea cucumber)	South China Sea near Guangdong Province, China	Tong et al., 2005	-	-	-	-
PM050489	Resisting Cell Death	inhibited the polymerization of tubulin	polyketide		Martin et al. 2013	preclinical	Lithoplocamia lithistoides (sponge)	Madagascar	Martin et al., 2013	180-190* m	https://obis.org/taxon/167995	-	-
PM060184	Resisting Cell Death	inhibited the polymerization of tubulin	polyketides		Martin et al. 2013	Phase II	Lithoplocamia lithistoides (sponge)	Madagascar	Martin et al., 2013	180-190* m	https://obis.org/taxon/167995	-	-
Polatuzumab Vedotin	Resisting Cell Death	deliver MMAE drug to cell targeted by antibody	vedotin		Zhao et al. 2019	Approved for treatment of relapsed/refractory diffuse large B-cell lymphoma	N/A (synthetic)	N/A (synthetic)	N/A (synthetic)	N/A (synthetic)	N/A (synthetic)	N/A (synthetic)	N/A (synthetic)
Psammaplin A	Resisting Cell Death, Inducing Angiogenesis	inhibits aminopeptidase N; inhibits histone decaetylase; down-regulation of cyclins and CDKs	disulfide bromotyrosine derivative		Simmons et al. 2005	preclinical	Psammaplin aplysilla (sponge)	Kingdom of Tonga	Quinoa and Crews, 1987	-	-	also found in marine microalgae, cyanobacteria, and symbiotic, heterotrophic bacteria	Lichota and Gwozdzinski, 2018
Squalamine	Inducing Angiogenesis	inhibits VEGF	aminosterol		Moore et al. 1993	Phase I-II	Squalus acanthias (Shark)	New England Coast	Moore et al., 1993	80-90* m	https://obis.org/taxon/105923	-	-
Symplostatin-1	Resisting Cell Death	inhibited the polymerization of tubulin	pentapeptide		Mooberry et al. 2003	preclinical	Symploca hydnoides (cyanobacterium)	Guam	Harrigan et al., 1998	10-20* m	https://obis.org/taxon/178513	-	-
Thiocoraline	Resisting Cell Death	inhibited the polymerization of tubulin	depsipeptide		Erba et al. 1999	preclinical	Micromonospora strain L-13-ACM2-092 (bacteria from marine soft coral)	Coast of Mozambique	Romero et al., 1997	0-10* m	https://obis.org/taxon/559597	-	-
Trabectedin	Resisting Cell Death, Inducing Angiogenesis, Avoiding Immune Destruction	binding to the minor groove of DNA; inhibits VEGF mRNA expression and inhibits the activity of cytokines	tetrahydroisoquinoline alkaloid		Haefner 2003	Approved for the treatment of soft tissue sarcoma	Ecteinascidia turbinata (tunicate)	Caribbean	Rinehart et al., 1991	0-10* m	https://obis.org/taxon/103756	Produced by bacterial symbiont, Candidatus Endoecteinascidia frumentensis.	Le et al., 2015; Lichota and Gwozdzinski, 2018
TZT-1027	Inducing Angiogenesis	acts additively with VEGF	tetrapeptide		Simmons et al. 2005	Phase II	synthetic derivative of Dolastatin 10	N/A (synthetic)	N/A (synthetic)	N/A (synthetic)	N/A (synthetic)	N/A (synthetic)	N/A (synthetic)
Variolin B	Evading Growth Suppressors	inhibits the activity of CDK1-cyclin B, CDK2-cyclin A, and CDK2/cyclin E complexes	pyridopyrrolopyrimidine alkaloid		Bettayeb et al. 2007	preclinical	Kirkpatrickia varialosa (sponge)	Cape Armitage in McMurdo Sound, Antarctica	Perry et al., 1994	18-25 m	Webster et al., 2004	aposematic coloration against predation	Perry et al., 1994
										* indicates that most common occurrence from OBIS data is reported
